# Supplementary material
Source: Springer Nature journal article supplement (https://www.springermedizin.de/resource/supplementary/12889_2009_2339_MOESM2_ESM.pdf/9485446)

# Demands: mean scale values by frequency of on-call duties

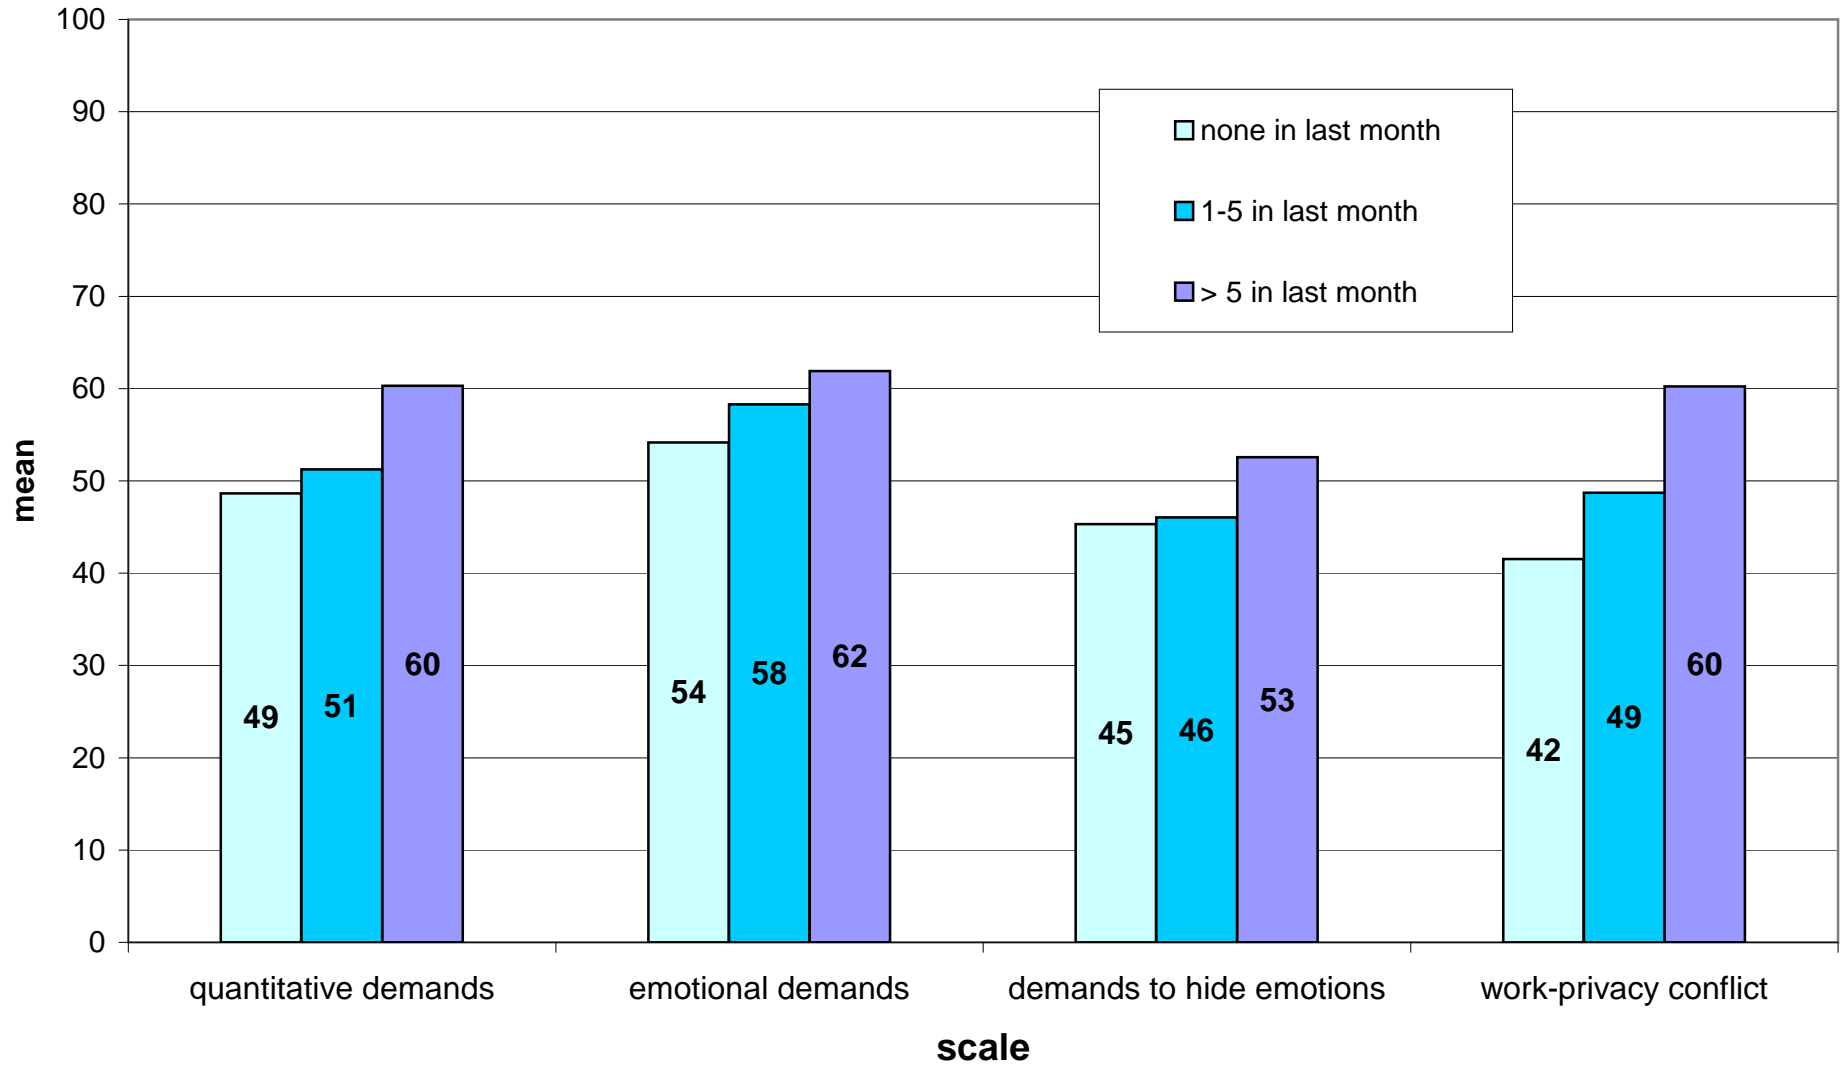

Supplement: MOESM2 [file 9485446]
